# Supplementary material
Source: PubMed Central journal article supplement (PMC7007377)
Supplement: NIHMS1546037-supplement-2.pdf [file NIHMS1546037-supplement-2.pdf]

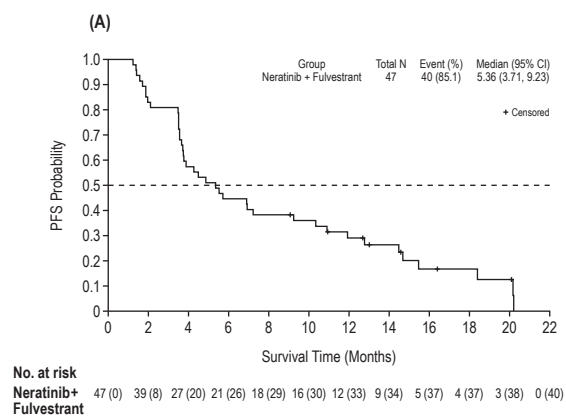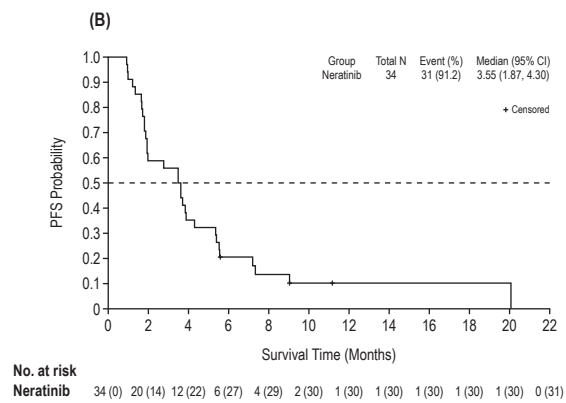

**Supplementary Figure S1.** SPFS of (A) neratinib plus fulvestrant combination cohort and (B) neratinib monotherapy cohort.

CI, confidence interval; PFS, progression-free survival.
