# Supplementary material
Source: PubMed Central journal article supplement (PMC7007377)
Supplement: NIHMS1546037-supplement-3.pdf [file NIHMS1546037-supplement-3.pdf]

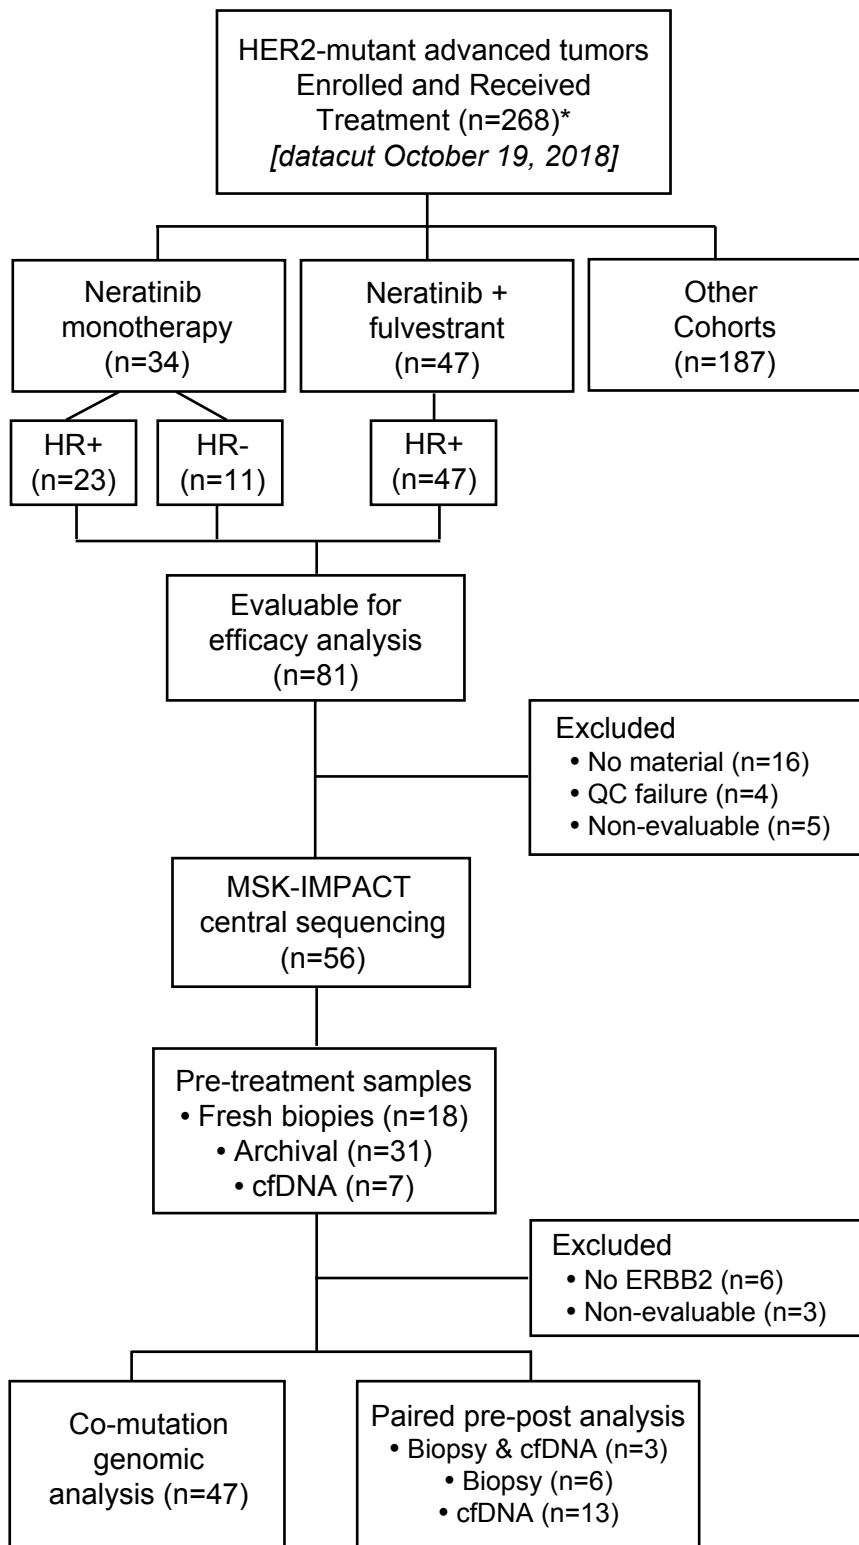

\* By local testing

**Supplementary Figure S2.** Overall sequencing CONSORT diagram. Flow diagram of study patients and analyzed biospecimens processed through and selected for central sequencing using MSK-IMPACT and Guardant360.

cfDNA, cell-free DNA; FFPE, formalin-fixed paraffin-embedded; MSK-IMPACT, Memorial Sloan Kettering-Integrated Mutation Profiling of Actionable Cancer Targets; QC, quality control.
