# Supplementary material
Source: PubMed Central journal article supplement (PMC7007377)
Supplement: NIHMS1546037-supplement-4.pdf [file NIHMS1546037-supplement-4.pdf]

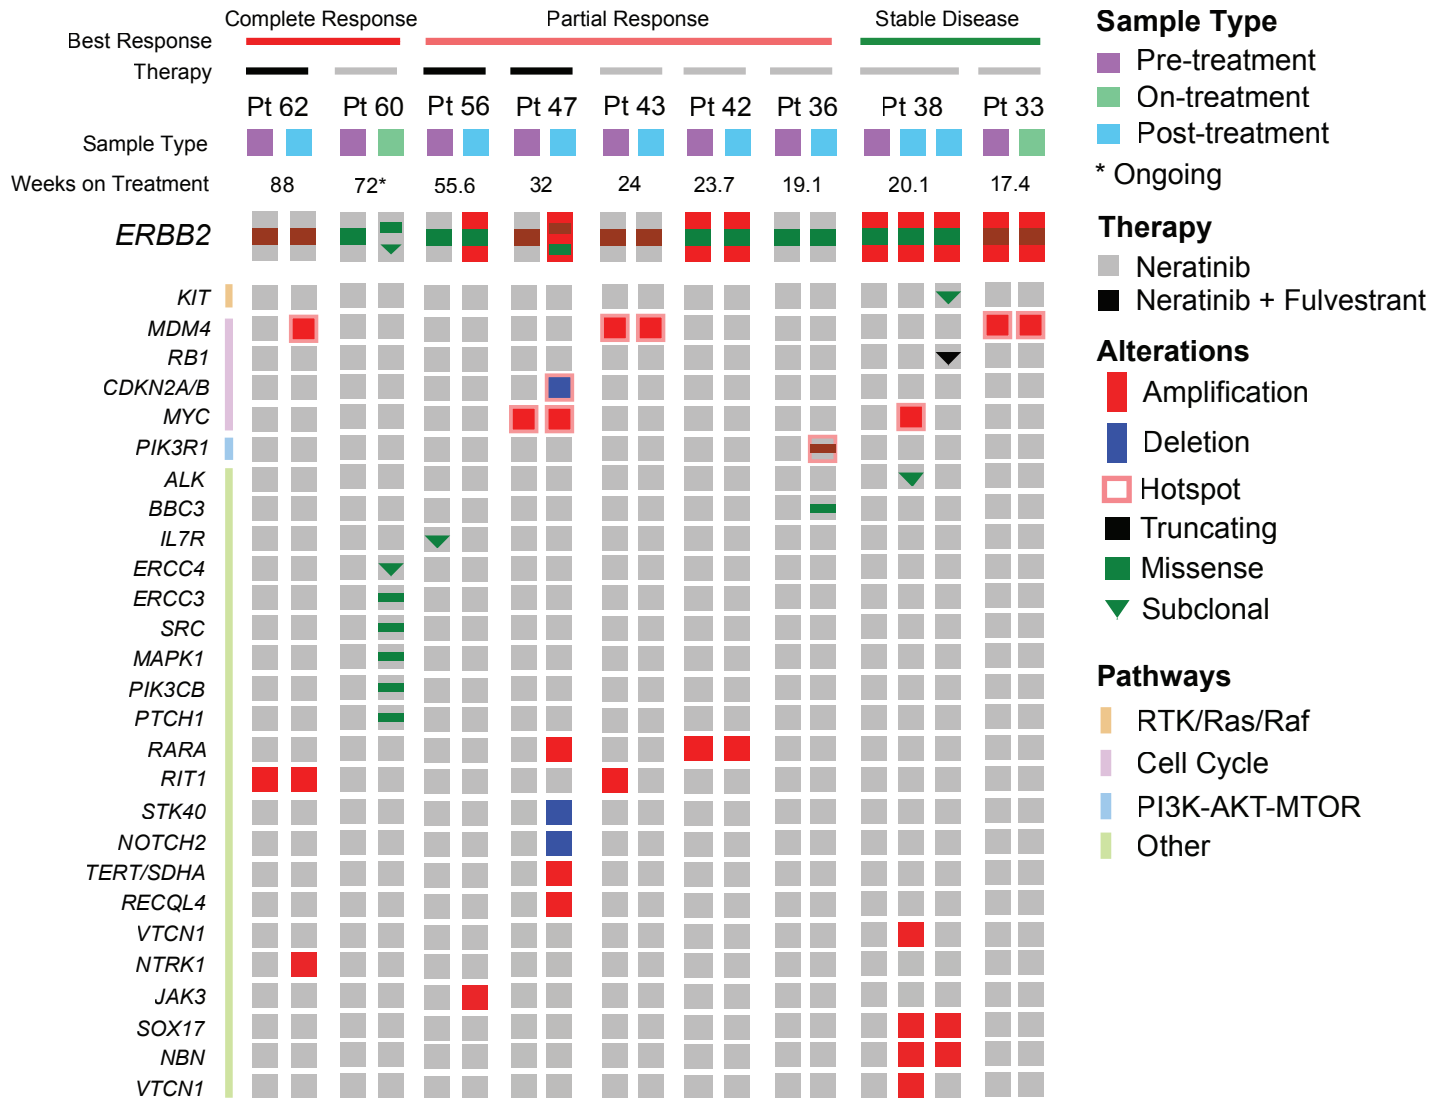

**Supplementary Figure S3.** Comprehensive OncoPrint of nine patients with paired pre- and post-treatment tissue sequencing showing acquired alterations in the post-treatment tumor.
